# Supplementary material for: Glacial Southern Ocean deep water Nd isotopic composition dominated by benthic modification
Source: Springer Nature journal article supplement (doi:10.1038/s41598-025-86350-y), 2025-01-20
Supplement: MOESM2 [file 41598_2025_86350_MOESM2_ESM.pdf]

1 **Supplementary Information for**

2

3 **Glacial Southern Ocean Deep Water Nd Isotopic Composition**

4 **Dominated by Benthic Modification**

5 Moritz Hallmaier<sup>1,2\*</sup>, Eva M. Rückert<sup>1,3\*</sup>, Yugeng Chen<sup>4</sup>, Jasmin M. Link<sup>1</sup>, Riccardo Lizio<sup>1</sup>,  
6 Gerrit Lohmann<sup>4,5</sup>, Marcus Gutjahr<sup>2</sup>, and Norbert Frank<sup>1</sup>

7 <sup>1</sup> Institute of Environmental Physics, Heidelberg University, Im Neuenheimer Feld 229, 69120  
8 Heidelberg, Germany

9 <sup>2</sup> GEOMAR Helmholtz Centre for Ocean Research Kiel, Wischhofstraße 1-3, 24148 Kiel, Germany

10 <sup>3</sup> Institute of Oceanography Hamburg, Bundesstraße 53, 20146 Hamburg

11 <sup>4</sup> Alfred Wegener Institute, Helmholtz Center for Polar and Marine Research, 27570 Bremerhaven,  
12 Germany

13 <sup>5</sup> University of Bremen, 28359 Bremen, Germany

14 **\*Corresponding authors E-mails:** [mhallmaier@geomar.de](mailto:mhallmaier@geomar.de); [eva.rueckert@iup.uni-](mailto:eva.rueckert@iup.uni-heidelberg.de)  
15 [heidelberg.de](mailto:eva.rueckert@iup.uni-heidelberg.de)

16

17 **This PDF file includes:** Supplementary text, Figures S1 to S11, SI References

18

19 **Other supplementary materials for this manuscript:** Dataset S1

20 **1. Age models**

21 For core PS 1768-8, we used the age model of Huang, et al. <sup>1</sup> for ages < 19 ka and > 116 ka. For the  
22 new measurements at core PS 1768-8, filling the gap of Huang, et al. <sup>1</sup> between 19 ka and 116 ka, the  
23 age models of <sup>2,3</sup> were refined by tuning of  $\delta^{18}\text{O}$  from *N. pachyderma* <sup>4</sup> to  $\delta\text{D}$  from Vostok ice core on  
24 the AICC2012 chronology <sup>5-7</sup> (Fig. S1), in a similar manner as done by Huang et al. for Termination I  
25 and II. Therefore, we built a coherent dataset with the existing  $\epsilon\text{Nd}$  measurements and age model  
26 optimizations of Huang and co-workers <sup>1</sup> verified by the matching  $\epsilon\text{Nd}$  values at the tie points of both  
27 studies (see also fig. S4).

28 For ODP 1093 the age model was revised based on existing studies <sup>8-10</sup> and a graphical correlation of  
29  $\delta^{18}\text{O}$ -data of *N. pachyderma* <sup>11</sup> to the Vostok ice core  $\delta\text{D}$  record on the AICC2012 chronology <sup>5-7</sup>  
30 (Fig. S2).

31 The tie points of the age models can be accessed in the attached Dataset S1. Due to the lack of  
32 foraminifera,  $\delta^{18}\text{O}$  data is sparse at both sites and the graphical correlation can show uncertainties.

33 A few sediment samples (n = 19) of ODP 1093 are not from the shipboard splice. Using magnetic  
34 susceptibility and color reflectance data <sup>11-13</sup>, we ensured that the meter-composite-depth (mcd) of these  
35 samples matches with the splice. However, minor differences could lead to deviations of up to ~3 ka  
36 (~0.5 m), as also discussed within the manuscript.

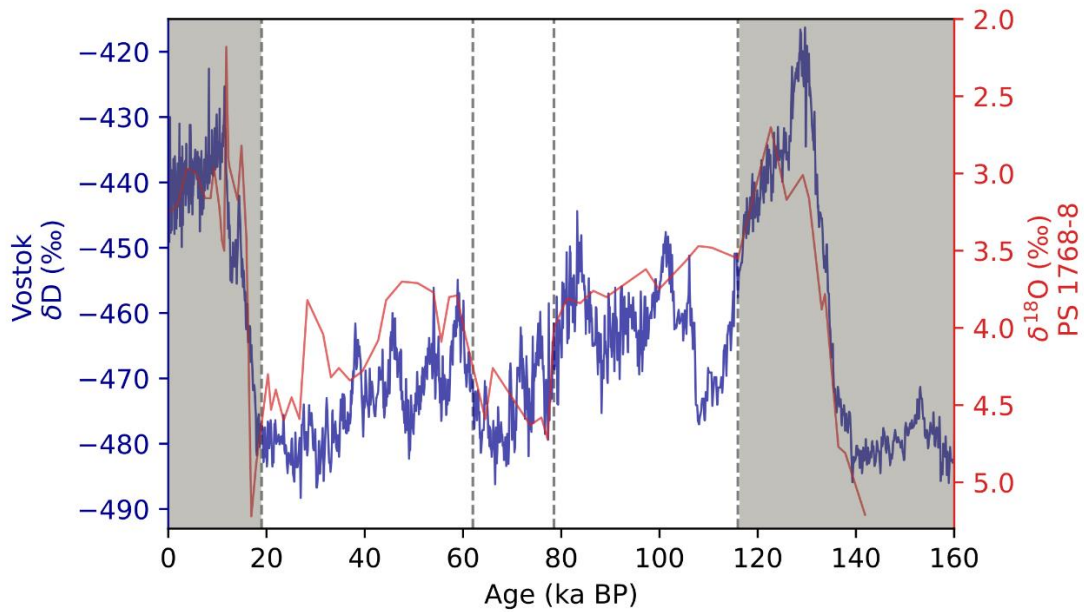

37

38 **Fig. S1:** Age model of core PS 1768-8. The blue curve shows the  $\delta D$  from Vostok ice core on the  
 39 AICC2012 chronology <sup>5-7</sup>, the red curve is the  $\delta^{18}O$  from *N. pachyderma* of core PS 1768-8 <sup>4</sup>. Tie-Points  
 40 marked by grey lines (see dataset 1). For Tie-Points younger than 19 ka and older than 116 ka (grey  
 41 marked areas) see <sup>1</sup>.

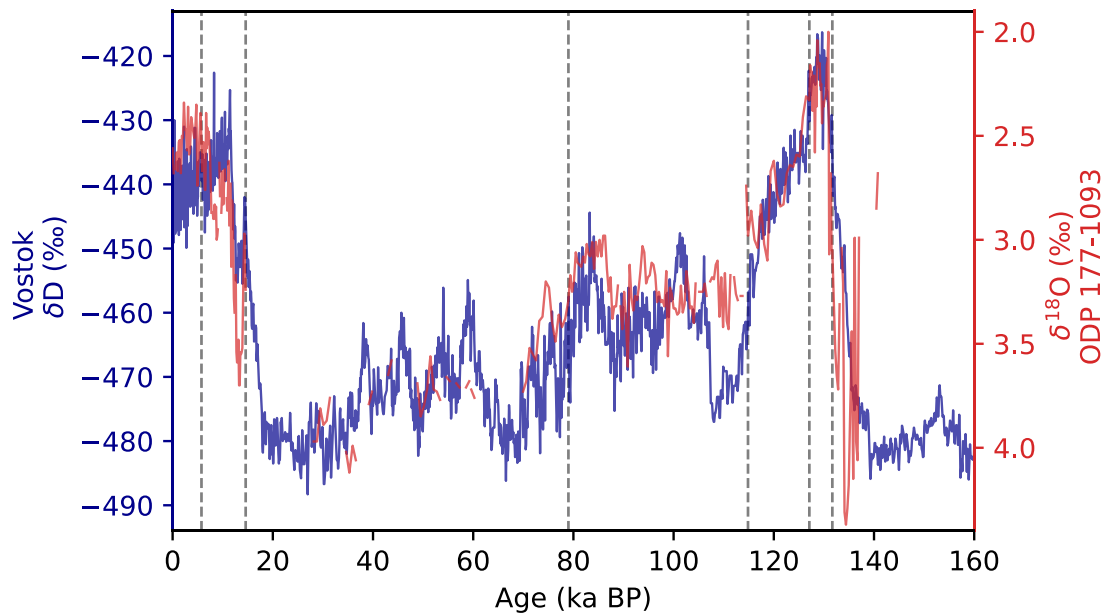

42

43 **Fig. S2:** Age model of core ODP 1093. The blue curve shows the  $\delta D$  from Vostok ice core on the  
 44 AICC2012 chronology <sup>5-7</sup>, the red curve is the  $\delta^{18}O$ -data of *N. pachyderma* of core ODP 1093 <sup>11</sup>. Tie-  
 45 Points marked by grey lines (see dataset 1).

46

47 **2. Test of the Leaching Protocol**

48 The applied leaching protocol was compared to a later published very short 10s leaching protocol, to  
49 access the potential influence at the studied sites.

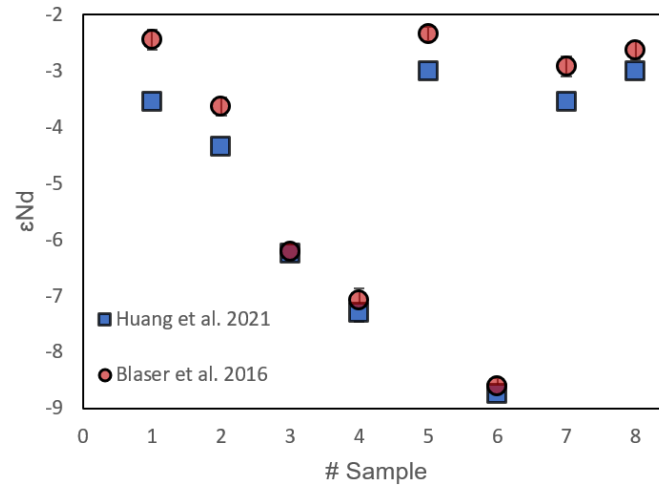

50 **Fig. S3:** Comparison of the used leaching protocol <sup>14</sup> and the 10s leaching protocol <sup>15</sup>. Small differences  
51 are observed for radiogenic samples. The maximal observed shift of 1.1 εNd is indicated as additional  
52 error bar in Fig. 2. This offset cannot explain the observed glacial-interglacial variability of up to 6 εNd.

53

54 **3. Comparison between leachate and seawater Nd isotope compositions**

55 The authigenic  $\epsilon_{Nd}$  records are compared with published nearby seawater values, planktonic  
 56 foraminifera in a nearby core, picked opal values, detrital measurements and volcanic material.

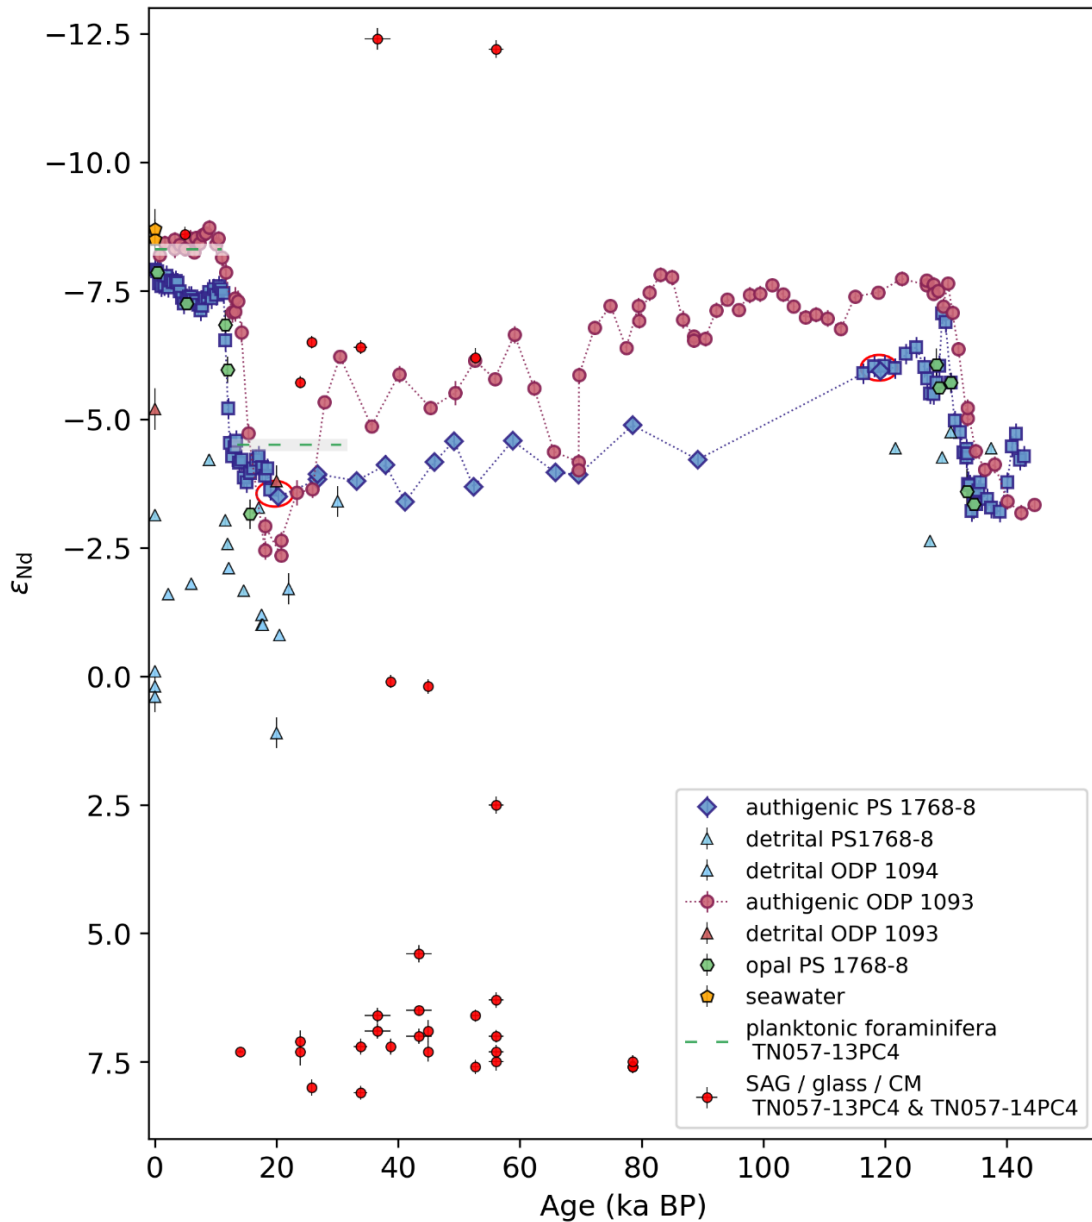

57

58 **Fig. S4:** The presented authigenic  $\epsilon_{Nd}$  records compared with published  $\epsilon_{Nd}$  data of different  
 59 components. Comparison with nearby seawater data (station 104, 4440 m and station 113, 2400 m)<sup>16</sup>,  
 60 opal data of PS 1768-8<sup>1</sup>, compositions of Holocene and glacial-aged planktic foraminifera  $\epsilon_{Nd}$   
 61 measurements of nearby core TN057-13PC4<sup>17</sup> shows that the leachates represent the authigenic  
 62 fraction. Comparison with detrital  $\epsilon_{Nd}$  of ODP 1093<sup>18</sup>, PS1768-8<sup>1</sup>, nearby site ODP 1094<sup>18,19</sup> and  
 63 volcanic material (single ash grains – SAG, glass, mixed clear minerals – CM)<sup>17</sup> shows that the observed  
 64 trends in the authigenic  $\epsilon_{Nd}$  records of this study are not reflecting the detrital material or individual  
 65 terrigenous components. Further, the red circles mark overlapping samples of authigenic  $\epsilon_{Nd}$  in  
 66 PS1768-8 and demonstrate that the leached samples of this study (diamonds) are perfectly in line with  
 67 another study/laboratory by Huang, et al.<sup>1</sup> (squares).

68 **4. Assessing the effect of sediment composition**

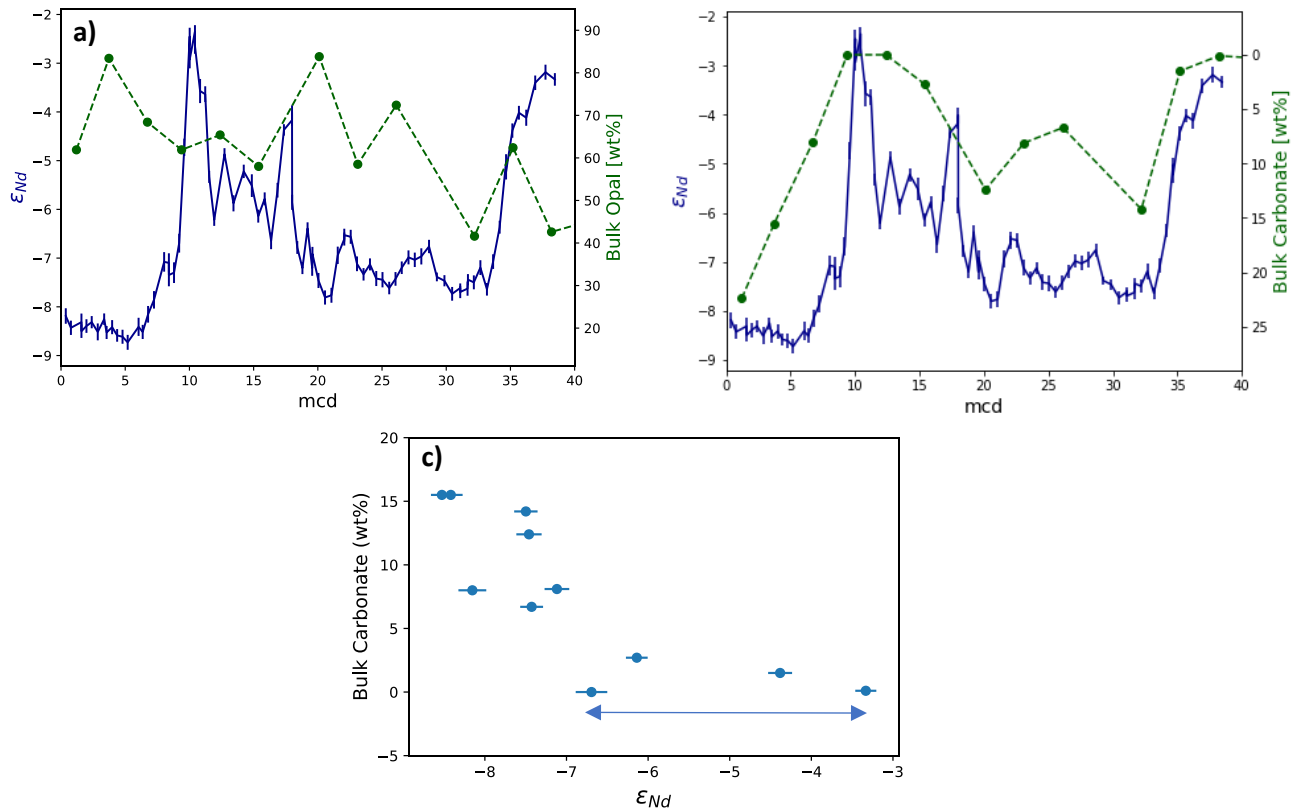

69

70 **Fig S5:**  $\epsilon_{Nd}$  at site ODP 1093 compared with bulk sediment composition (data from the scientific report  
 71 of ODP Leg 177<sup>13</sup>) **a)** Bulk opal content **b, c)** Bulk carbonate content.  
 72

73 The sediment is characterized by high opal concentration and low carbonate content. The carbonate  
 74 concentration is higher during interglacial periods. However, the  $\epsilon_{Nd}$  is not controlled by the carbonate  
 75 content, as we observe almost the full observed range in  $\epsilon_{Nd}$  from -7 to -2 for carbonate free samples.

76

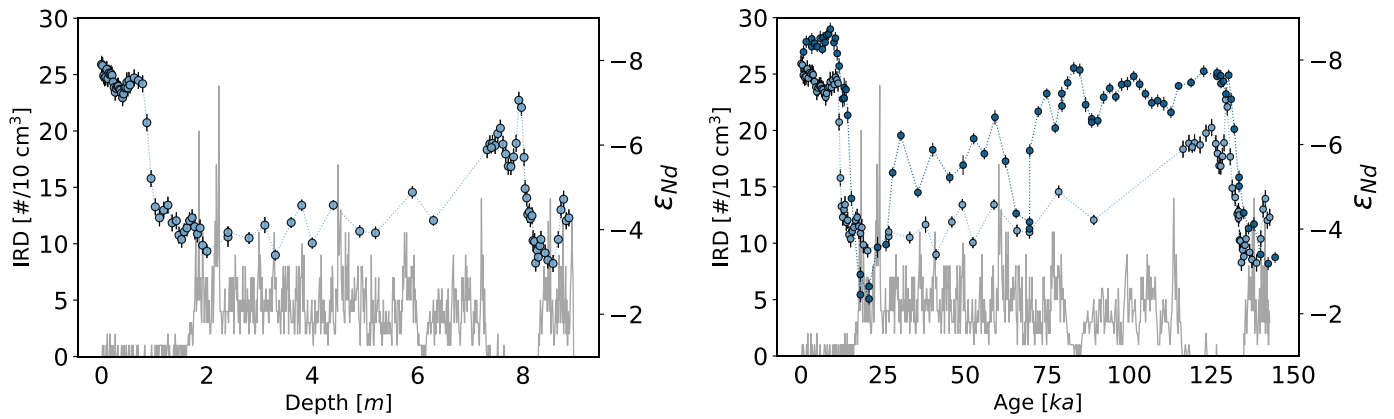

77

78 **Fig S6:**  $\epsilon\text{Nd}$  compared with IRD content of PS1768-8<sup>20</sup>.

79

80 The IRD input of the investigated sites is also climatically controlled. Glacial and cold periods are marked  
 81 by higher IRD input at the sites compared to the interglacials. However, the sharp terminations observed  
 82 in the Nd isotopic composition are not exactly coherent with the start of IRD input. We further measure  
 83 the full range in  $\epsilon\text{Nd}$  for sections with no IRD. Thus, the observed main climate signal is not controlled  
 84 by IRD input. Nevertheless, the most radiogenic values at 20 ka BP might be to some extent influenced  
 85 by a significant IRD event in this region.

86

87 **5. Potential dust influence on Nd leaching**

88 Dust input (as indicated by Fe fluxes) is increased during colder climates<sup>8,21</sup>, as it is also controlled by  
89 glacial-interglacial changes. Thus, the  $\epsilon\text{Nd}$  signature and the dust input are climatically controlled and a  
90 strong correlation is not surprising, as seen at ODP Site 1093.

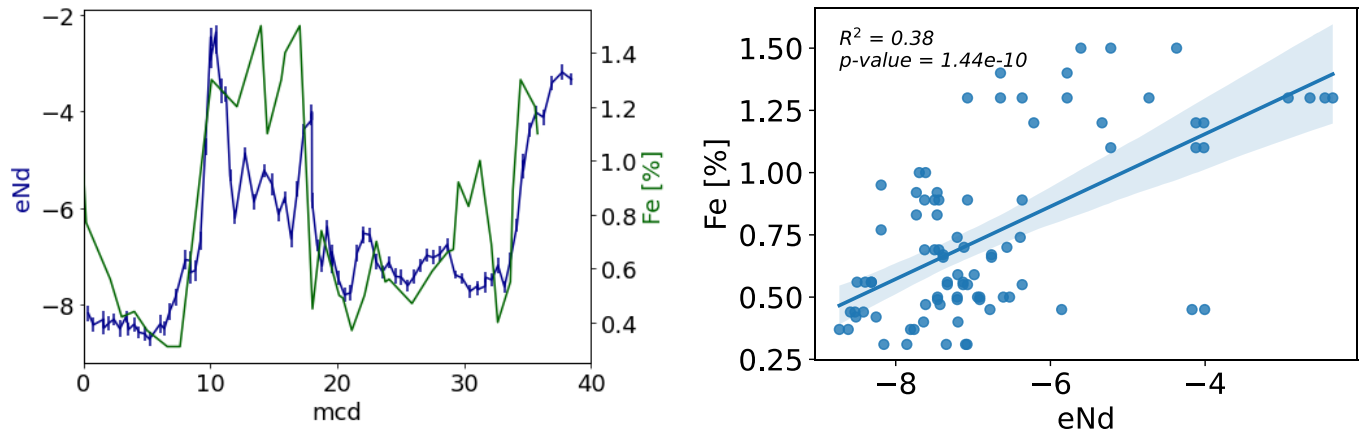

91 **Fig S7: a)**  $\epsilon\text{Nd}$  and Fe concentration as a measure of dust concentration in the sediment of ODP Site  
92 1093. Fe data from <sup>8</sup>. **b)** Linear regression of iron concentration vs.  $\epsilon\text{Nd}$ .

93 However, we can clearly identify two groups, one with high dust input (mainly glacials) and one with low  
94 dust input (mainly interglacial). If we perform the linear regression on the two groups separately, the  
95 correlation vanishes, which indicates a case of the Simpson's paradox.

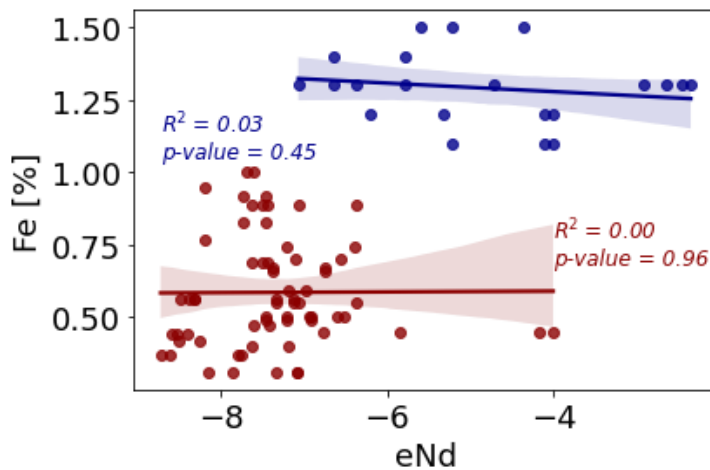

96 **Fig S8:** Linear regression for separate clusters of high and low Fe content.

97 Thus, the measured leaches are independent from changes in the dust content or sediment composition.  
98 Almost the whole range in  $\epsilon\text{Nd}$  was measured regardless of whether the sediment section bears high or  
99 low Fe content. An observed correlation is therefore not necessarily a causal consequence or  
100 explanation; both signals are rather simply climatically controlled.



101 **6. Model experiment**

102 To further test the hypothesis of a large-scale Pacific intrusion into the Atlantic Section of the Southern  
103 Ocean, we run an Ocean general circulation model simulation (FESOM2.0). A tracer was released in  
104 the Equatorial East Pacific (seafloor to 1000m), and compared for a present day and LGM run.  
105

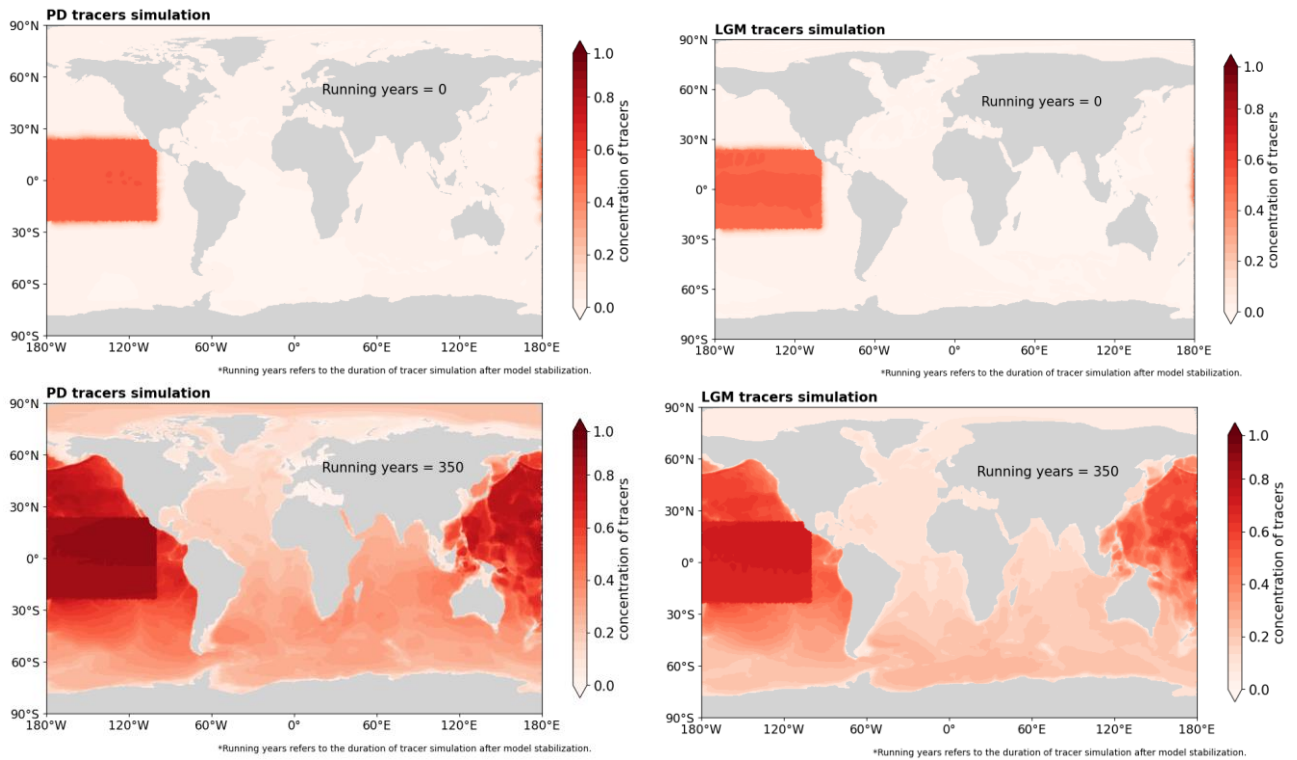

106

107 **Fig. S9:** Initial tracer distribution and after 350 running years after model stabilization.

108 7.  $\epsilon$ Nd and authigenic Pb across Termination I

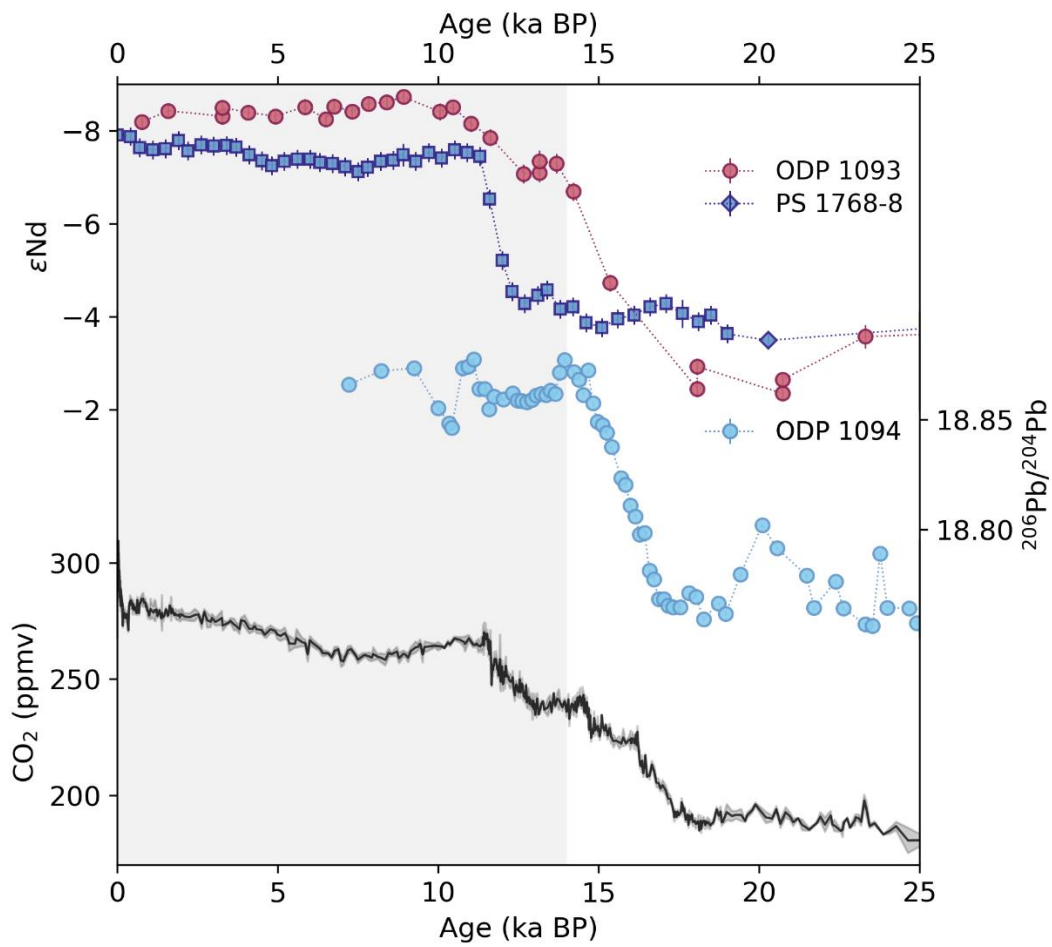

109

110 **Fig. S10:**  $\epsilon$ Nd at Site ODP 1093 and PS1768-8 <sup>1</sup> and authigenic Pb at Site ODP 1094<sup>1</sup> across  
 111 Termination I. Shift in  $\epsilon$ Nd at ODP 1093 starts earlier than in PS1768-8 and in two steps. The first step  
 112 is synchronous to the shift in authigenic Pb (ODP 1094) and the second one synchronous to the change  
 113 in  $\epsilon$ Nd in PS1768-8.

114

115 **8.  $\epsilon$ Nd data compilation**

116 To obtain more information about the water mass distribution in different depths and to place our results  
117 in a larger perspective, existing  $\epsilon$ Nd data of the SO and South Atlantic south of 29°S were compiled and  
118 extended by the novel results of this study to develop glacial and interglacial  $\epsilon$ Nd depth profiles of the  
119 Atlantic section of the SO (Fig. 6, S10). The core locations, water depths,  $\epsilon$ Nd data and references can  
120 be found in Dataset S1. The influences of various locations must be considered, as latitudinal and  
121 longitudinal differences lead to variations in the  $\epsilon$ Nd signal. For example, core locations further north in  
122 the Cape Basin are reached from a much higher amount of NADW flowing along the eastern Atlantic  
123 margin southward. This leads to less radiogenic  $\epsilon$ Nd values. The data was limited to locations east of  
124 the Drake-Passage and west of Cape Agulhas (20°E), as well as latitudes south of 29°S. All these  
125 locations are within a similar Coriolis driven flow path of water moving north and south.

126 To complete the lack of sediment derived  $\epsilon$ Nd data from < 1000 m water depth, we include cold-water  
127 coral  $\epsilon$ Nd data for the upper water column from the Drake Passage <sup>22</sup>.

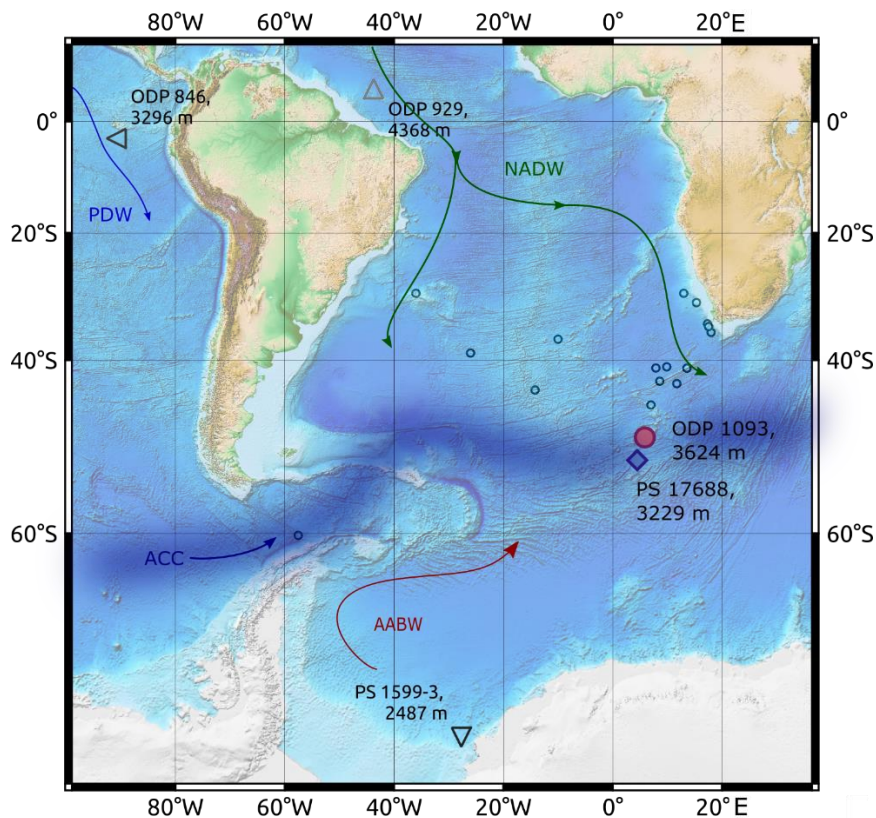

128

129 **Fig. S11:** Overview map of the core sites, which are shown with similar symbols in Figure 2. The small  
130 circles show the different core sites used for the compilation leading to Figure 6. Arrows show the main  
131 deep water pathways. The bathymetry is based on ETOPO1 Global Relief Model <sup>23</sup>.

132

- 133 **Dataset S1 (separate file):** Excel file containing measured  $\epsilon\text{Nd}$  data, core compilation and age model
- 134 tie points.

135 **References:**

- 136
- 137
- 138 1 Huang, H., Gutjahr, M., Eisenhauer, A. & Kuhn, G. No detectable Weddell Sea Antarctic Bottom  
139 Water export during the Last and Penultimate Glacial Maximum. *Nat Commun* **11**, 424,  
140 doi:10.1038/s41467-020-14302-3 (2020).
- 141 2 Frank, M., Mangini, A., Gersonde, R., van der Loeff, M. R. & Kuhn, G. Late Quaternary sediment  
142 dating and quantification of lateral sediment redistribution applying  $^{230}\text{Th}_{\text{ex}}$ : A study from the  
143 eastern Atlantic sector of the Southern Ocean. *Geologische Rundschau* **85**, 554-566 (1996).
- 144 3 Frank, M. *et al.* Similar glacial and interglacial export bioproductivity in the Atlantic Sector of  
145 the Southern Ocean: Multiproxy evidence and implications for glacial atmospheric CO<sub>2</sub>.  
146 *Paleoceanography* **15**, 642-658, doi:10.1029/2000pa000497 (2000).
- 147 4 Niebler, H.-S. in *In supplement to: Niebler, H-S (1995): Rekonstruktionen von Paläo-  
148 Umweltparametern anhand von stabilen Isotopen und Faunen-Vergesellschaftungen  
149 planktischer Foraminiferen im Südatlantik = Reconstruction of paleo-environmental  
150 parameters using stable isotopes and faunal assemblages of planktonic foraminifera in the  
151 South Atlantic Ocean. Berichte zur Polarforschung = Reports on Polar Research, 167, 198 pp,  
152 [https://doi.org/10.2312/BzP\\_0167\\_1995](https://doi.org/10.2312/BzP_0167_1995) (PANGAEA, 2002).*
- 153 5 Petit, J. R. *et al.* Climate and atmospheric history of the past 420,000 years from the Vostok ice  
154 core, Antarctica. *Nature* **399**, 429-436, doi:10.1038/20859 (1999).
- 155 6 Bazin, L. *et al.* An optimized multi-proxy, multi-site Antarctic ice and gas orbital chronology  
156 (AICC2012): 120-800 ka. *Clim. Past* **9**, 1715-1731, doi:10.5194/cp-9-1715-2013 (2013).
- 157 7 Veres, D. *et al.* The Antarctic ice core chronology (AICC2012): an optimized multi-parameter  
158 and multi-site dating approach for the last 120 thousand years. *Clim. Past* **9**, 1733-1748,  
159 doi:10.5194/cp-9-1733-2013 (2013).
- 160 8 Lal, D. *et al.* Paleo-ocean chemistry records in marine opal: Implications for fluxes of trace  
161 elements, cosmogenic nuclides (10Be and 26Al), and biological productivity. *Geochimica et  
162 Cosmochimica Acta* **70**, 3275-3289, doi:10.1016/j.gca.2006.04.004 (2006).
- 163 9 Schneider-Mor, A. *et al.* Nutrient regime at the siliceous belt of the Atlantic sector of the  
164 Southern Ocean during the past 660 ka. *Paleoceanography* **23**, doi:10.1029/2007pa001466  
165 (2008).
- 166 10 Schneider Mor, A. *et al.* Variable sequence of events during the past seven terminations in two  
167 deep-sea cores from the Southern Ocean. *Quaternary Research* **77**, 317-325,  
168 doi:10.1016/j.yqres.2011.11.006 (2012).
- 169 11 Hodell, D. A., Charles, C. D., Curtis, J. H., Mortyn, P. G., Ninnemann, U. S., and Venz, K. A. in  
170 *Proceedings of the Ocean Drilling Program, 177 Scientific Results* Vol. 177 (ed R. Gersonde,  
171 Hodell, D. A., and Blum, P) (2003).
- 172 12 Gersonde, R., Hodell, D.A., Blum, P. Proc. ODP, Init. Repts., 177. *College Station, TX (Ocean  
173 Drilling Program)*, doi:10.2973/odp.proc.ir.177.1999 (1999).
- 174 13 Gersonde, R., Hodell, D.A., and Blum, P. (Eds.). Proc. ODP, Sci. Results, 177. *College Station, TX  
175 (Ocean Drilling Program)*, doi:doi:10.2973/odp.proc.sr.177.2003 (2003).
- 176 14 Blaser, P. *et al.* Extracting foraminiferal seawater Nd isotope signatures from bulk deep sea  
177 sediment by chemical leaching. *Chemical Geology* **439**, 189-204,  
178 doi:10.1016/j.chemgeo.2016.06.024 (2016).
- 179 15 Huang, H., Gutjahr, M., Kuhn, G., Hathorne, E. C. & Eisenhauer, A. Efficient Extraction of Past  
180 Seawater Pb and Nd Isotope Signatures From Southern Ocean Sediments. *Geochemistry,  
181 Geophysics, Geosystems* **22**, doi:10.1029/2020gc009287 (2021).
- 182 16 Stichel, T., Frank, M., Rickli, J. & Haley, B. A. The hafnium and neodymium isotope composition  
183 of seawater in the Atlantic sector of the Southern Ocean. *Earth and Planetary Science Letters*  
184 **317-318**, 282-294, doi:10.1016/j.epsl.2011.11.025 (2012).
- 185 17 Nielsen, S. H. H., Hodell, D. A., Kamenov, G., Guilderson, T. & Perfit, M. R. Origin and  
186 significance of ice-rafted detritus in the Atlantic sector of the Southern Ocean. *Geochemistry,  
187 Geophysics, Geosystems* **8**, doi:10.1029/2007GC001618 (2007).

- 188 18 Noble, T. L. *et al.* Greater supply of Patagonian-sourced detritus and transport by the ACC to  
189 the Atlantic sector of the Southern Ocean during the last glacial period. *Earth and Planetary*  
190 *Science Letters* **317-318**, 374-385, doi:10.1016/j.epsl.2011.10.007 (2012).
- 191 19 Latimer, J. C., Filippelli, G. M., Hendy, I. L., Gleason, J. D. & Blum, J. D. Glacial-interglacial  
192 terrigenous provenance in the southeastern Atlantic Ocean: The importance of deep-water  
193 sources and surface currents. *Geology* **34**, doi:10.1130/g22252.1 (2006).
- 194 20 Diekmann, B. *et al.* in *The South Atlantic in the Late Quaternary* 375-399 (Springer, 2003).
- 195 21 Martínez-García, A. *et al.* Iron Fertilization of the Subantarctic Ocean During the Last Ice Age.  
196 *Science* **343**, 1347-1350, doi:doi:10.1126/science.1246848 (2014).
- 197 22 Wilson, D. J. *et al.* Sea-ice control on deglacial lower cell circulation changes recorded by Drake  
198 Passage deep-sea corals. *Earth and Planetary Science Letters* **544**, 116405,  
199 doi:<https://doi.org/10.1016/j.epsl.2020.116405> (2020).
- 200 23 Amante, C. & Eakins, B. ETOPO1 1 Arc-Minute Global Relief Model: Procedures, Data Sources  
201 and Analysis, National Geophysical Data Center, NESDIS, NOAA, US Dept. *Commerce, Boulder,*  
202 *CO, USA*, doi:doi:10.7289/V5C8276M (2009).

203
