# Supplementary material for: Glacial Southern Ocean deep water Nd isotopic composition dominated by benthic modification
Source: Sci Rep. 2025 Jan 20;15:2586. doi: 10.1038/s41598-025-86350-y (PMC11747105; doi:10.1038/s41598-025-86350-y)
Supplement: Supplementary file 1 — Supplementary Material 1 [file 41598_2025_86350_MOESM1_ESM.xlsx]

## Sheet: readme
Hallmaier et al. 2024
eNd_data	εNd data all produced at the Institute of Environmental Physics, Heidelberg University
data_compilation	compiled Holocene and LGM εNd data of sediment cores from the South Atlantic and Atlantic section of the Southern Ocean sorted by water depth (fig. 3)
agepoints	new tie points for the age models of sediment cores ODP 177-1093 and PS 1768-8
References:
Huang.2020	Huang, H., Gutjahr, M., Eisenhauer, A., & Kuhn, G. (2020). No detectable weddell sea antarctic bottom water export during the last and penultimate Glacial Maximum. Nature communications, 11(1), 1-10.
Wilson.2020	Wilson, D. J., Struve, T., van de Flierdt, T., Chen, T., Li, T., Burke, A., & Robinson, L. F. (2020). Sea-ice control on deglacial lower cell circulation changes recorded by Drake Passage deep-sea corals. Earth and Planetary Science Letters, 544, 116405.
Hu.2016	Hu, R., Noble, T. L., Piotrowski, A. M., McCave, I. N., Bostock, H. C., & Neil, H. L. (2016). Neodymium isotopic evidence for linked changes in Southeast Atlantic and Southwest Pacific circulation over the last 200 kyr. Earth and Planetary Science Letters, 455, 106-114.
Howe.2016	Howe, J. N., Piotrowski, A. M., Noble, T. L., Mulitza, S., Chiessi, C. M., & Bayon, G. (2016). North Atlantic deep water production during the Last Glacial Maximum. Nature communications, 7(1), 1-8.
Hines.2021	Hines, S. K. V., Bolge, L., Goldstein, S. L., Charles, C. D., Hall, I. R., & Hemming, S. R. (2021). Little change in ice age water mass structure from Cape Basin benthic neodymium and carbon isotopes. Paleoceanography and Paleoclimatology, 36, e2021PA004281. https://doi.org/10.1029/2021PA004281
Wei.2016	Wei, R., Abouchami, W., Zahn, R., & Masque, P. (2016). Deep circulation changes in the South Atlantic since the Last Glacial Maximum from Nd isotope and multi-proxy records. Earth and Planetary Science Letters, 434, 18-29.
Skinner.2013	Skinner, L. C., Scrivner, A. E., Vance, D., Barker, S., Fallon, S., & Waelbroeck, C. (2013). North Atlantic versus Southern Ocean contributions to a deglacial surge in deep ocean ventilation. Geology, 41(6), 667-670.
Chen.2013	Chen, T., 2013. The geochemical cycling and paleoceanographic application of combined oceanic Nd-Hf isotopes. D.Phil. Thesis, University of Kiel, Kiel, Germany.
Lippold.2016	Lippold, J., Gutjahr, M., Blaser, P., Christner, E., de Carvalho Ferreira, M. L., Mulitza, S., ... & Jaccard, S. L. (2016). Deep water provenance and dynamics of the (de) glacial Atlantic meridional overturning circulation. Earth and planetary science letters, 445, 68-78.
Piotrowski.2005	Piotrowski, A. M., Goldstein, S. L., Hemming, S. R., & Fairbanks, R. G. (2005). Temporal relationships of carbon cycling and ocean circulation at glacial boundaries. Science, 307(5717), 1933-1938.
Piotrowski.2012	Piotrowski, A. M., Galy, A., Nicholl, J. A. L., Roberts, N., Wilson, D. J., Clegg, J. A., & Yu, J. (2012). Reconstructing deglacial North and South Atlantic deep water sourcing using foraminiferal Nd isotopes. Earth and Planetary Science Letters, 357, 289-297.

## Sheet: eNd_data
core	description	depth [mcd]	age [ka]	eNd	internal eNd_err (2SE)
ODP 1093	A1H1W 37 - 38	0.37	0.761344	-8.18867	0.159065
	A1H1W 77 - 78	0.77	1.58442	-8.43058	0.146795
	A1H2W 9 - 10	1.59	3.27172	-8.31432	0.176231
	A1H2W 9 - 10	1.59	3.27172	-8.50035	0.138541
	A1H2W 48 - 49	1.98	4.07422	-8.39466	0.139849
	A1H2W 89 - 90	2.39	4.91787	-8.31516	0.125139
	A1H2W 136 - 137	2.86	5.84073	-8.51454	0.173556
	A1H3W 36 - 37	3.36	6.50079	-8.25351	0.117898
	A1H3W 55 - 56	3.55	6.75161	-8.52688	0.13393
	A1H3W 98 - 99	3.98	7.31926	-8.41742	0.144624
	A1H3W 137 - 138	4.37	7.8341	-8.58643	0.129601
	A1H4W 29 - 30	4.79	8.38855	-8.61415	0.144114
	A1H4W 69 - 70	5.19	8.9166	-8.72893	0.153219
	A1H5W 4 - 5	6.04	10.0387	-8.41103	0.186162
	A1H5W 36 - 37	6.36	10.4611	-8.51536	0.14552
	A1H5W 78 - 79	6.78	11.0156	-8.15345	0.170731
	A1H5W 124 - 125	7.24	11.6228	-7.85653	0.179299
	B1H2W 125 - 126	8.03	12.6657	-7.07786	0.200499
	B1H3W 12 - 13	8.4	13.1542	-7.09716	0.19567
	B1H3W 12 - 13	8.4	13.1542	-7.34658	0.232057
	B1H3W 52 - 53	8.8	13.6822	-7.29929	0.212158
	B1H3W 92 - 93	9.2	14.2103	-6.69366	0.193377
	B1H3W 132 - 133	9.6	15.3561	-4.72586	0.178304
	B1H4W 24 - 25	10.02	18.0728	-2.45084	0.178594
	B1H4W 24 - 25	10.02	18.0728	-2.92604	0.179007
	A2H2W 25 - 26	10.43	20.7247	-2.34989	0.130792
	A2H2W 25 - 26	10.43	20.7247	-2.64403	0.162344
	A2H2W 65 - 66	10.83	23.3121	-3.57096	0.247738
	A2H2W 105 - 106	11.23	25.8994	-3.63501	0.161655
	A2H2W 136 - 137	11.54	27.9045	-5.33268	0.124386
	A2H3W 25 - 27	11.93	30.4271	-6.21505	0.123442
	A2H3W 105 - 107	12.73	35.6018	-4.86626	0.122466
	A2H4W 25 - 27	13.43	40.1295	-5.87572	0.165542
	A2H4W 105 - 107	14.23	45.3041	-5.21982	0.137501
	A2H5W 18 - 20	14.86	49.3792	-5.51287	0.232892
	A2H5W 68 - 70	15.36	52.6133	-6.13868	0.133132
	A2H5W 118 - 120	15.86	55.8474	-5.78411	0.13269
	A2H6W 18 - 20	16.36	59.0815	-6.64566	0.171316
	A2H6W 68 - 70	16.86	62.3157	-5.60615	0.150674
	A2H6W 118 - 120	17.36	65.5498	-4.36902	0.117372
	A2H7W 31 - 33	17.99	69.6248	-4.16917	0.118808
	A2H7W 31 - 33	17.99	69.6248	-4.00593	0.141799
	B2H3W 96 - 97	18	69.6895	-5.85502	0.154935
	B2H3W 136 - 137	18.4	72.2768	-6.78191	0.13146
	B2H4W 26 - 27	18.8	74.8641	-7.20562	0.122639
	B2H4W 66 - 67	19.2	77.4514	-6.39014	0.124267
	A3H1W 18 - 20	19.56	79.4427	-7.20509	0.158006
	B2H4W 104 - 105	19.58	79.5158	-6.91368	0.143918
	A3H1W 67 - 69	20.05	81.2349	-7.4595	0.154795
	A3H1W 118 - 120	20.56	83.1002	-7.80856	0.145114
	A3H2W 18 - 20	21.06	84.9289	-7.76305	0.153092
	A3H2W 67 - 69	21.55	86.7211	-6.94255	0.177995
	A3H2W 118 - 120	22.06	88.5864	-6.60891	0.133692
	A3H2W 118 - 120	22.06	88.5864	-6.52815	0.131498
	A3H3W 18 - 20	22.56	90.4151	-6.56273	0.143712
	A3H3W 67 - 69	23.05	92.2073	-7.11737	0.151231
	A3H3W 118 - 120	23.56	94.0726	-7.33301	0.127996
	A3H4W 18 - 20	24.06	95.9013	-7.12952	0.123576
	A3H4W 67 - 69	24.55	97.6935	-7.41961	0.153958
	A3H4W 115.5 - 117.5	25.035	99.4673	-7.44377	0.156803
	A3H5W 18 - 20	25.56	101.388	-7.61425	0.128726
	A3H5W 67 - 69	26.05	103.18	-7.42704	0.140201
	A3H5W 115.5 - 117.5	26.535	104.954	-7.19785	0.129106
	A3H6W 18 - 20	27.06	106.874	-6.98556	0.143556
	A3H6W 67 - 69	27.55	108.666	-7.03523	0.148193
	A3H6W 118 - 120	28.06	110.531	-6.96473	0.166028
	A3H7W 28 - 30	28.66	112.726	-6.76175	0.136902
	C3H2W 13 - 14	29.27	115.04	-7.38665	0.0897244
	C3H2W 72 - 73	29.86	118.843	-7.46487	0.114643
	C3H2W 132 - 133	30.46	122.71	-7.73323	0.141009
	C3H3W 45 - 46	31.09	126.771	-7.61393	0.0939917
	C3H3W 45 - 46	31.09	126.771	-7.69543	0.126256
	A4H1W 18 - 20	31.66	127.916	-7.62635	0.145793
	C3H3 105 - 106	31.69	127.963	-7.44237	0.11393
	A4H1W 67 - 69	32.15	128.691	-7.49767	0.143244
	A4H1W 118 - 120	32.66	129.498	-7.1953	0.151704
	A4H2W 19 - 21	33.17	130.305	-7.64024	0.129081
	A4H2W 67 - 69	33.65	131.065	-7.07205	0.150263
	A4H2W 118 - 120	34.16	132.029	-6.36527	0.132401
	A4H3W 18 - 20	34.66	133.475	-5.01527	0.147456
	A4H3W 18 - 20	34.66	133.475	-5.22492	0.161578
	A4H3W 67 - 69	35.15	134.893	-4.38262	0.146819
	A4H3W 118 - 120	35.66	136.368	-4.01658	0.141262
	A4H4W 25 - 27	36.23	138.017	-4.11909	0.165486
	A4H4W 95 - 97	36.93	140.041	-3.40142	0.148819
	A4H5W 25 - 27	37.73	142.355	-3.18393	0.153763
	A4H5W 98 - 100	38.46	144.467	-3.33269	0.128995
PS 1768-8	200	2	20.2836	-3.48956	0.161445
	240	2.4	26.7015	-3.82729	0.235086
	240	2.4	26.7015	-3.93458	0.142476
	280	2.8	33.1194	-3.80128	0.139491
	310	3.1	37.9328	-4.10809	0.188853
	330	3.3	41.1418	-3.39769	0.126202
	360	3.6	45.9552	-4.16853	0.130312
	380	3.8	49.1642	-4.57631	0.135729
	400	4	52.3731	-3.68067	0.130297
	440	4.4	58.791	-4.57979	0.118188
	490	4.9	65.8088	-3.962	0.143252
	520	5.2	69.6175	-3.92346	0.146934
	590	5.9	78.5046	-4.8827	0.146306
	630	6.3	89.207	-4.21575	0.119798
	740	7.4	119.22	-5.9405	0.133033

## Sheet: data_compilation
core	latitude	longitude	water depth [m]	Holocene age [ka]	Holocene eNd	LGM age [ka]	LGM eNd	reference	comment		Holocene: 0 - 11 ka BP
Shackelton Fracture Zone	-60.18	-57.53	817	11.85	-8.39	18.05	-7.63	Wilson.2020	coral		LGM: 18 - 26.5 ka BP
						18.63	-7.87	Wilson.2020	coral
						19.63	-6.74	Wilson.2020	coral
						20.27	-7.45	Wilson.2020	coral
						20.37	-5.91	Wilson.2020	coral
						22.58	-7.24	Wilson.2020	coral
						22.7	-6.32	Wilson.2020	coral
						24.96	-6.52	Wilson.2020	coral
						25.59	-6.43	Wilson.2020	coral
						25.95	-6.48	Wilson.2020	coral
ODP 1087	-31.47	15.32	1372	2.87834	-8.92263	18.4398	-7.68021	Hu.2016
				5.47191	-8.80002	21.0432	-7.90527	Hu.2016
				8.06548	-8.74454	24.9484	-7.09059	Hu.2016
				10.6591	-8.92587			Hu.2016
ODP 1088	-41.13	13.57	2082	1.2	-8.4	18.3	-7.8	Hu.2016
				2.4	-8.9	18.3	-7.6	Hu.2016
				3.6	-9.5	20.7	-7.7	Hu.2016
				4.9	-9.4	21.75	-7.4	Hu.2016
				4.9	-9.9	23	-7.5	Hu.2016
				6.1	-8.7	23	-6.4	Hu.2016
				7.3	-9.4	25.3	-7.6	Hu.2016
				7.3	-9.6	25.3	-7	Hu.2016
				8.4	-9			Hu.2016
				8.5	-9.2			Hu.2016
				9.7	-9			Hu.2016
				10.9	-8.8			Hu.2016
				10.93	-8.6			Hu.2016
CH 115-70	-30	-36	2340		-10.3		-8.6	Howe.2016
MD 02-2594	-34.72	17.33	2440	0.3	-8.74	18.3	-6.73	Wei.2016
				0.7	-9.09	19.6	-7.27	Wei.2016
				1.2	-8.86	20.8	-7.24	Wei.2016
				1.8	-8.88	22.7	-6.88	Wei.2016
				2.8	-8.6	24.1	-7.57	Wei.2016
				3.5	-8.67			Wei.2016
				4.6	-8.93			Wei.2016
				5	-8.51			Wei.2016
				5.5	-8.66			Wei.2016
				6.1	-8.97			Wei.2016
				7.1	-8.67			Wei.2016
				7.8	-8.67			Wei.2016
				8.4	-9.1			Wei.2016
				8.6	-8.69			Wei.2016
				9.5	-9.02			Wei.2016
				9.7	-9.05			Wei.2016
				10	-9.2			Wei.2016
				10.3	-9.79			Wei.2016
				10.9	-8.85			Wei.2016
PS 1599-3	-74.1	-27.7	2487	5.69709	-7.73942	18.5155	-8.05713	Huang.2020
				7.00742	-7.69284	19.9398	-7.88889	Huang.2020
				8.48866	-7.67372	21.7397	-8.09727	Huang.2020
				10.5966	-7.74131	22.2051	-7.97654	Huang.2020
						22.6704	-8.12862	Huang.2020
						23.1357	-8.08428	Huang.2020
						23.4374	-8.48889	Huang.2020
						23.6755	-8.34459	Huang.2020
						23.9231	-8.25634	Huang.2020
						24.1517	-8.44527	Huang.2020
						24.3898	-8.74216	Huang.2020
						24.6279	-8.42826	Huang.2020
RC 13-253	-46	7	2494		-8.5		-8.3	Howe.2016
U1479	-35.055	17.401	2615	5.938	-10.41	18.022	-8.8	Hines.2021
				6.574	-10.59	18.658	-8.44	Hines.2021
				7.21	-10.8	18.658	-8.34	Hines.2021
				7.846	-10.5	19.294	-8.83	Hines.2021
				8.482	-10.29	21.579	-8	Hines.2021
				9.118	-10.58	21.579	-9.4	Hines.2021
				9.754	-10.75	23.04	-8.11	Hines.2021
				10.39	-10.3	24.5	-7.88	Hines.2021
						24.5	-7.96	Hines.2021
						25.961	-8.01	Hines.2021
RC 11-86	-36	18	2829		-9.9		-8	Howe.2016
GeoB3603-2	-35.1333	17.55	2840	1	-8.42	18.6	-7.56	Wei.2016
				2.5	-8.76	20.6	-7.36	Wei.2016
				3.3	-8.78	21.7	-7.22	Wei.2016
				5.4	-8.99			Wei.2016
				7.4	-8.82			Wei.2016
				10.7	-8.71			Wei.2016
MD 96-2085	-30	13	3001		-10.6		-8.6	Howe.2016
PS 1768-8	-52.59	4.48	3299	0	-7.91191	18.058	-3.90326	Huang.2020
				0.3726	-7.8756	18.5452	-4.04252	Huang.2020
				0.7452	-7.64364	19.0325	-3.62706	Huang.2020
				1.1178	-7.58899	20.2836	-3.48956	Huang.2020 / this study
				1.4904	-7.6072			Huang.2020
				1.863	-7.78757			Huang.2020
				2.2356	-7.5739			Huang.2020
				2.6082	-7.70357			Huang.2020
				2.9808	-7.6749			Huang.2020
				3.3534	-7.69411			Huang.2020
				3.726	-7.6514			Huang.2020
				4.0986	-7.49009			Huang.2020
				4.4712	-7.35979			Huang.2020
				4.8438	-7.25004			Huang.2020
				5.2164	-7.34245			Huang.2020
				5.589	-7.3925			Huang.2020
				5.9616	-7.3925			Huang.2020
				6.3342	-7.32385			Huang.2020
				6.7068	-7.30214			Huang.2020
				7.0794	-7.23142			Huang.2020
				7.452	-7.1225			Huang.2020
				7.8246	-7.20843			Huang.2020
				8.1972	-7.35354			Huang.2020
				8.5698	-7.37278			Huang.2020
				8.9424	-7.47795			Huang.2020
				9.315	-7.34841			Huang.2020
				9.6876	-7.52851			Huang.2020
				10.06	-7.42426			Huang.2020
				10.46	-7.58684			Huang.2020
				10.86	-7.53101			Huang.2020
RC 12-294	-37	-10	3308		-9.4		-7	Howe.2016
ODP 1093	-49.98	5.87	3624	0.761344	-8.18867	18.07	-2.45	this study
				1.58442	-8.43058	18.07	-2.93	this study
				3.27172	-8.31432	20.7247	-2.34989	this study
				3.27172	-8.50035	20.7247	-2.64403	this study
				4.07422	-8.39466	23.3121	-3.57096	this study
				4.91787	-8.31516	25.8994	-3.63501	this study
				5.84073	-8.51454			this study
				6.50079	-8.25351			this study
				6.75161	-8.52688			this study
				7.31926	-8.41742			this study
				7.8341	-8.58643			this study
				8.38855	-8.61415			this study
				8.9166	-8.72893			this study
				10.0387	-8.41103			this study
				10.4611	-8.51536			this study
TNO 57-6 PC4	-42.9	8.6	3702		-9.4		-6.4	Howe.2016
MD 07-3076	-44.07	-14.2	3770	1.29572	-9.2	18.0062	-5.7	Skinner.2013
				5.38508	-9.8	18.7182	-5.5	Skinner.2013
				8.11082	-9.8	19.4033	-5.4	Skinner.2013
				10.9005	-8.7	20.5123	-5.7	Skinner.2013
						22.2555	-5.5	Skinner.2013
						23.5503	-5.5	Skinner.2013
RC 12-267	-39	-26	4144		-8.8		-4.9	Howe.2016
PS 2082-1	-43.22	11.73	4610	4.2	-8.9	18.8	-5.7	Chen.2013
				8.5	-8.7	18.8	-5.9	Chen.2013
						18.8	-6	Chen.2013
						18.8	-6.1	Chen.2013
						20.3	-5.5	Chen.2013
						23.3	-5.9	Chen.2013
ODP 1089	-40.94	9.89	4620	0.1	-9.35	18.1	-6.98	Lippold.2016
				0.8	-9.1	18.8	-8.04	Lippold.2016
				3	-9.16	20.4	-7.23	Lippold.2016
				3.6	-9.45	22	-7.26	Lippold.2016
				4	-9.42	23.7	-7.45	Lippold.2016
				5	-9.51	25.3	-7.59	Lippold.2016
				6.1	-10.22			Lippold.2016
				6.4	-9.87			Lippold.2016
				6.6	-9.35			Lippold.2016
				7.3	-9.61			Lippold.2016
				7.7	-9.79			Lippold.2016
				7.9	-9.14			Lippold.2016
				8.1	-9.47			Lippold.2016
				8.5	-8.75			Lippold.2016
				8.6	-8.97			Lippold.2016
				9.6	-8.83			Lippold.2016
				9.7	-8.86			Lippold.2016
				10.6	-8.11			Lippold.2016
RC 11-83	-41.07	9.717	4718	6.3	-9.34	18.49	-6.53	Piotrowski.2005
				6.98	-9.31	20.36	-6.4	Piotrowski.2005
				7.71	-9.18			Piotrowski.2005
				8.06	-8.93			Piotrowski.2005
				8.1	-8.46			Piotrowski.2005
				8.28	-9.28			Piotrowski.2005
				9.27	-9.61			Piotrowski.2005
				9.32	-9.02			Piotrowski.2005
				9.51	-8.49			Piotrowski.2005
				9.74	-8.99			Piotrowski.2005
				10.02	-9.34			Piotrowski.2005
				10.54	-8.58			Piotrowski.2005
TNO 57-21	-41.1	7.9	4981	6.3 - 6.6	-10.13	18.4	-6.93	Piotrowski.2012
				7.7	-8.99	18.6	-6.84	Piotrowski.2012
				8.1	-9.94	19	-6.77	Piotrowski.2012
				10	-9.24	20.03	-6.56	Piotrowski.2012 / .2005
				8.9	-9.14	20.74	-6.59	Piotrowski.2012 / .2005
				10.9	-9.76	21.47	-6.95	Piotrowski.2012 / .2005
						21.91	-6.82	Piotrowski.2005
						22.33	-6.33	Piotrowski.2005
						22.73	-6.69	Piotrowski.2005
						23.22	-6.74	Piotrowski.2005
						23.61	-6.84	Piotrowski.2005
						24.01	-6.44	Piotrowski.2005
						24.41	-6.77	Piotrowski.2005
						24.83	-6.52	Piotrowski.2005
						25.3	-7.27	Piotrowski.2005
						25.98	-6.97	Piotrowski.2005
						26.44	-6.82	Piotrowski.2005

## Sheet: agepoints
	age [ka]	depth [mcd]	comment
ODP 1093	0	0
	5.76152	2.8
	14.5799	9.48
	79.0038	19.44
	114.847	29.24
	127.093	31.14
	131.682	34.04
	336.04	104.69
PS 1768-8	< 19		see Huang.2020
	19	1.92	Tuning / Huang.2020
	62	4.6
	77.3	5.8
	115.963	7.3
	> 116		see Huang.2020
